# Supplementary material
Source: publisher site journal article supplement (https://www.spandidos-publications.com/1830/downloadSupplementary)

Figure S1. Detection of introduced miR-137 mimics and miR-210 inhibitor. (A) RT-qPCR detection for miR-137 mimics; \*P<0.05, vs. NC mimics group; (B) RT-qPCR detection of the miR-210 inhibitor. \*P<0.05, vs. NC inhibitor group.

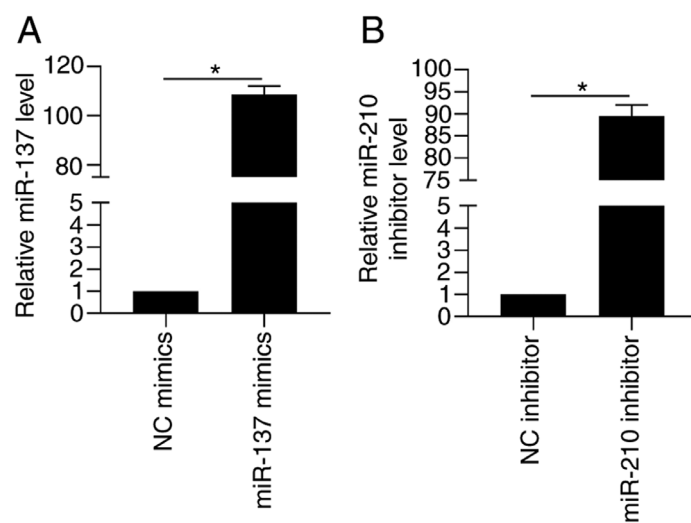

Supplement: Supplementary file 1 [file downloadSupplementary]
